# Supplementary material for: Three Vessel Coronary Cameral Fistulae Associated with New Onset Atrial Fibrillation and Angina Pectoris
Source: Case Rep Vasc Med. 2014 Feb 19;2014:475325. doi: 10.1155/2014/475325 (PMC3971846; doi:10.1155/2014/475325)
Supplement: Supplementary file 1 — Video 1. Antero-posterior oblique projection of left coronary angiogram depicting the CCFs opacifying the left ventricular cavity mimicking a left ventriculography. Video 2. Left oblique projection of right coronary angiogram demonstrating contrast media leaking into left ventricle from the distal segment of right coronary artery through CCFs. [file 475325.f1.zip]

Archive with 2 entries (2 files):
- 475325.f1/mat.475325.v1.avi
- 475325.f1/Video2.Right Coronary Angiography.avi
